# Supplementary material for: Deep learning versus parametric and ensemble methods for genomic prediction of complex phenotypes
Source: PubMed Central journal article supplement (PMC7038529; doi:10.1186/s12711-020-00531-z), 2020-02-24

Figure S2

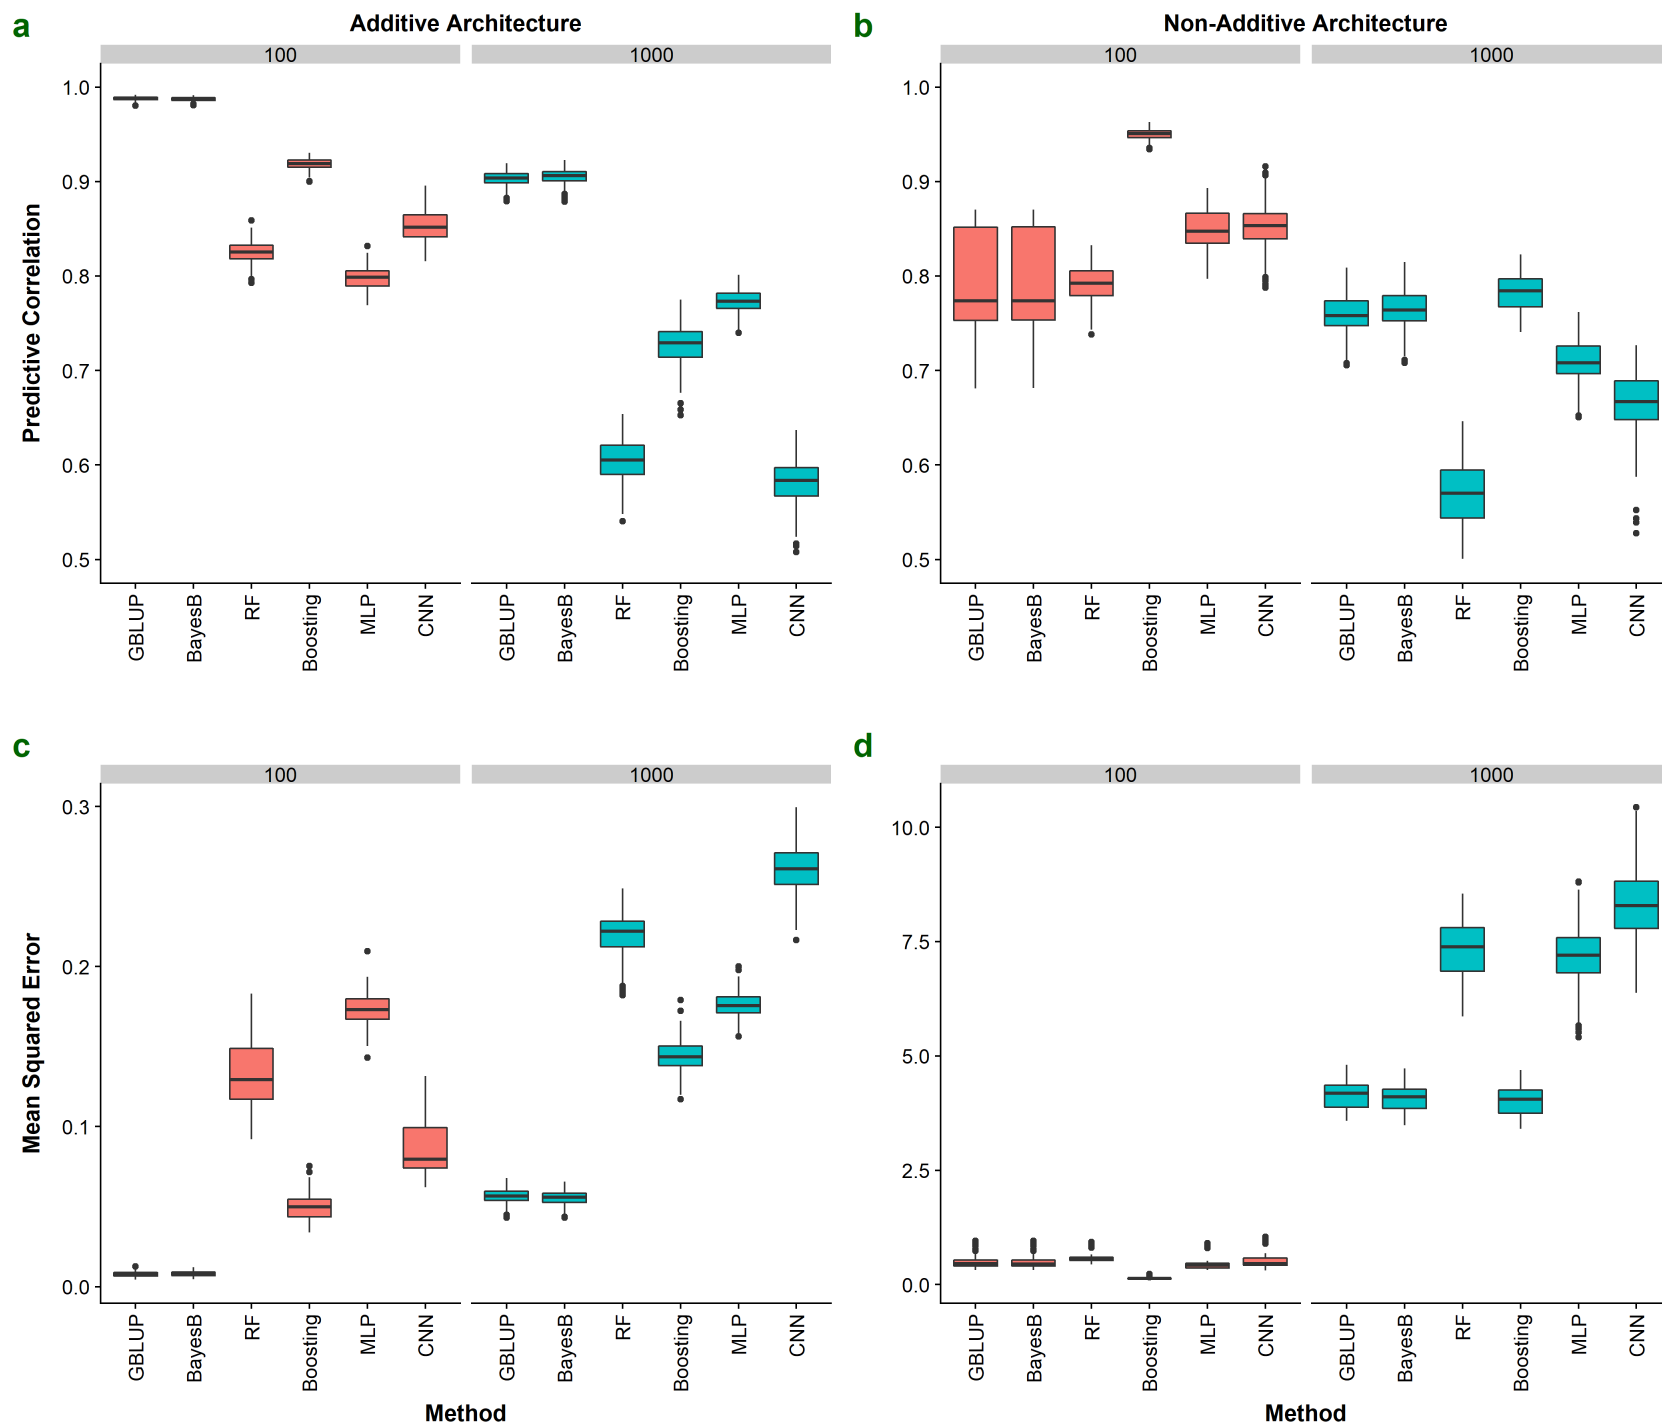

Figure S3

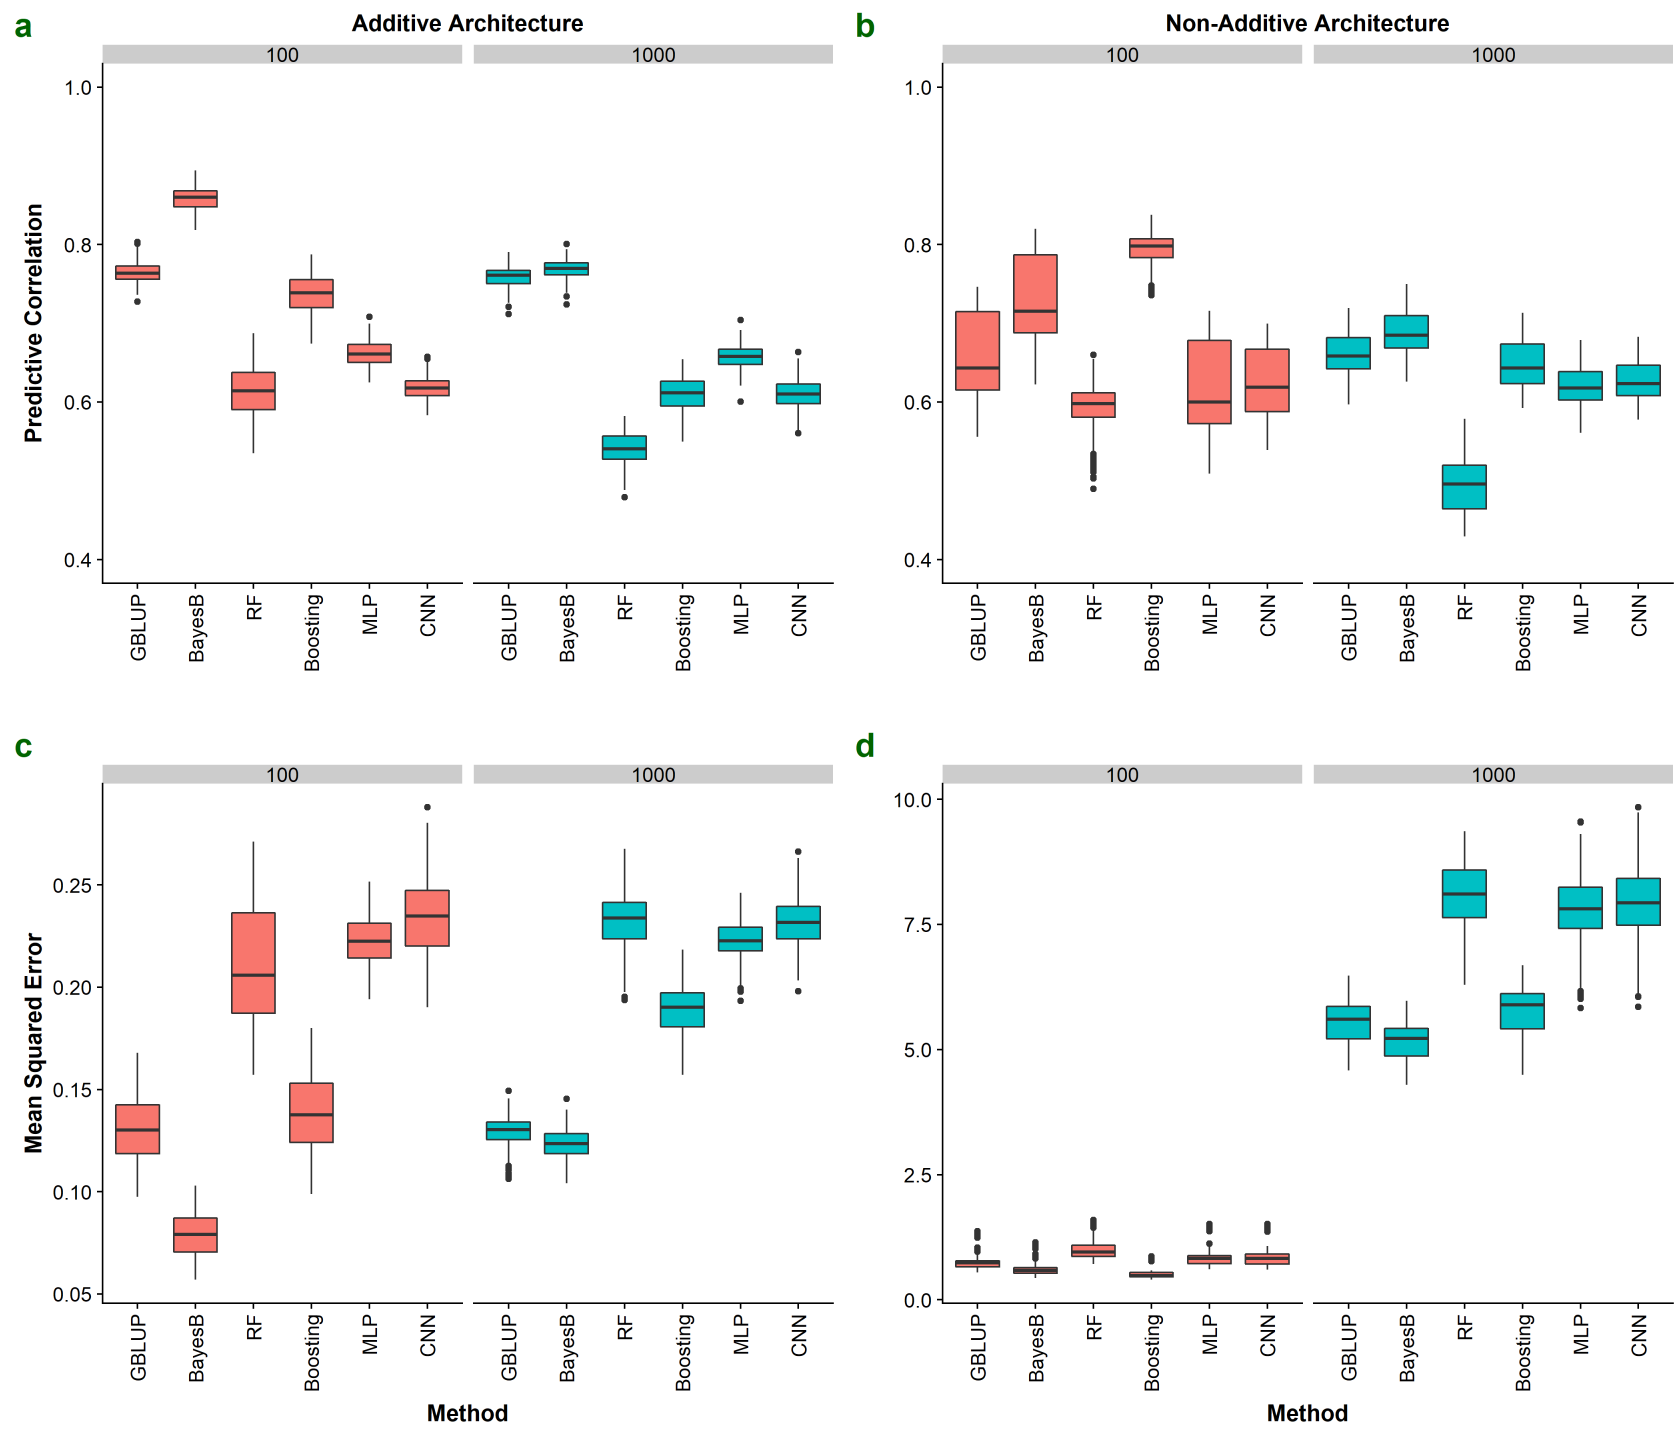

Figure S4

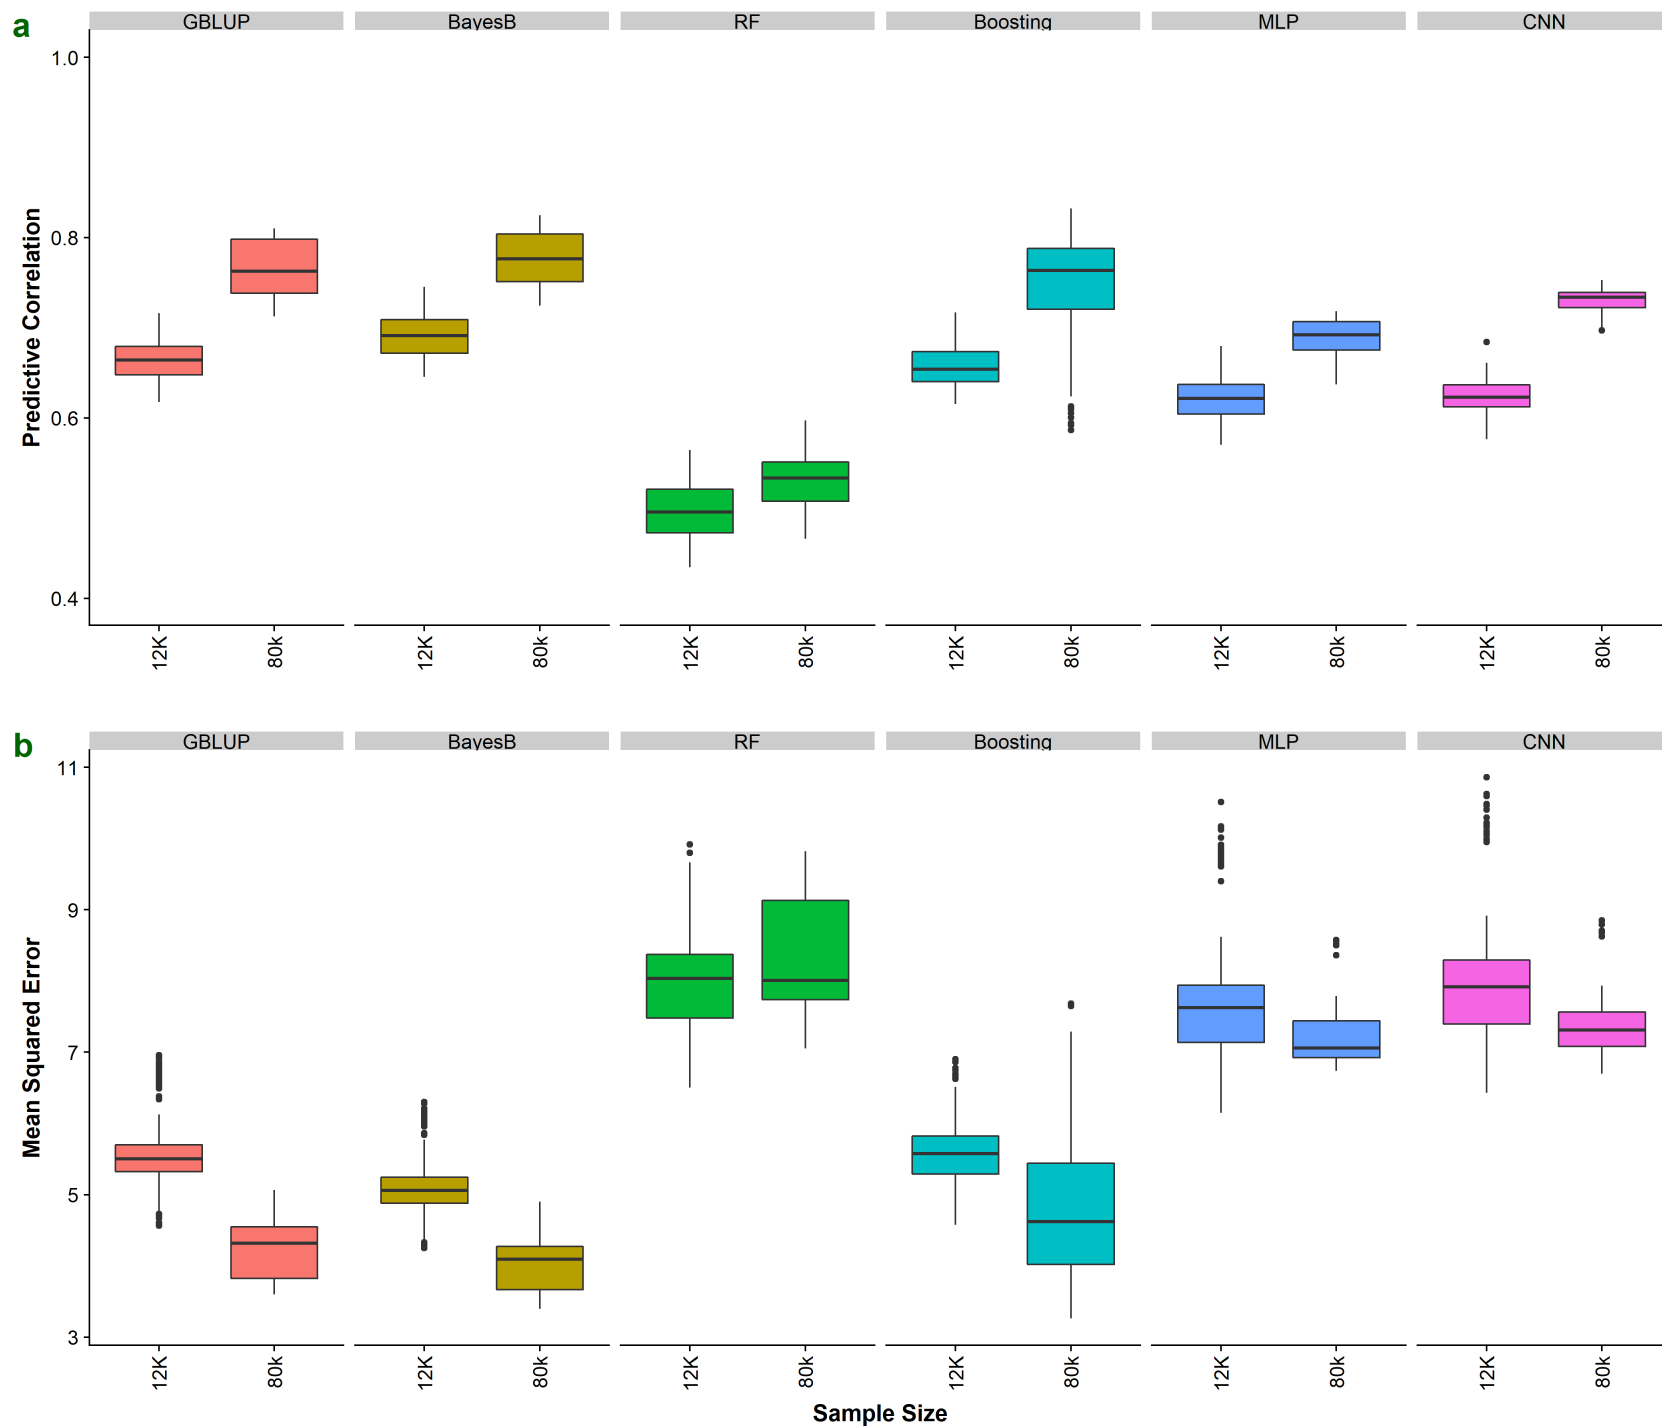

Supplement: 12711_2020_531_MOESM2_ESM.pdf [file 12711_2020_531_MOESM2_ESM.pdf]
